# Supplementary material
Source: PubMed Central journal article supplement (PMC2835333)
Supplement: supp_137.7.1205_DEV041251TableS1.pdf [file supp_137.7.1205_DEV041251TableS1.pdf]

**Table S1. Statistics on *Phox2a* induction of chick midbrain oculomotor markers**

| Gene of interest (GOI) | Age of harvested embryo | Ectopic GOI expression/number of embryos analyzed | Totals for GOI |
|------------------------|-------------------------|---------------------------------------------------|----------------|
| <i>PHOX2A</i>          | E3                      | 5/5                                               | 48/80          |
|                        | E4                      | 11/28                                             |                |
|                        | E5                      | 22/36                                             |                |
|                        | E6                      | 10/11                                             |                |
| <i>PHOX2B</i>          | E4                      | 11/13                                             | 11/13          |
| <i>ISL1</i>            | E3                      | 5/5                                               | 67/85          |
|                        | E4                      | 8/21                                              |                |
|                        | E5                      | 11/16                                             |                |
|                        | E6                      | 43/43                                             |                |
| <i>ISL2</i>            | E5                      | 17/18                                             | 17/18          |
| <i>NKX6.1</i>          | E5                      | 5/8                                               | 5/8            |
| <i>SLIT3</i>           | E5                      | 8/8                                               | 8/8            |
| <i>NRG1</i>            | E5                      | 1/8                                               | 6/14           |
|                        | E6                      | 5/6                                               |                |
| <i>CHAT</i>            | E6                      | 5/8                                               | 5/8            |
| <i>VT</i>              | E5                      | 8/13                                              | 74/86          |
|                        | E6                      | 66/73                                             |                |
| <i>TBX20</i>           | E5                      | 4/9                                               | 28/45          |
|                        | E6                      | 24/36                                             |                |

pEFX-*rPhox2a/Arix* was electroporated into chick embryos between HH st 9 and st 14. Embryos were harvested and in situ hybridization performed to test for induction of OMC marker gene expression. All embryos tallied were analyzed as whole-mounts with one-color or two-color gene detection methods. We were unable to test for ectopic induction of *ROBO2* and *CX36* because these genes are also expressed in lateral midbrain, which obscures detection of any ectopic gene expression (data not shown).
