# Supplementary material
Source: PubMed Central journal article supplement (PMC2835333)
Supplement: supp_137.7.1205_DEV041251TableS2.pdf [file supp_137.7.1205_DEV041251TableS2.pdf]

**Table S2. Behaviors of *Phox2a*-induced nerves**

| Embryo       | Number of axons that stop in mesenchyme | Number of axons joining trochlear nerve | Number of axons joining oculomotor nerve | Number of axons targeting a muscle directly | Total number of ectopic exits |
|--------------|-----------------------------------------|-----------------------------------------|------------------------------------------|---------------------------------------------|-------------------------------|
| 1            | 1                                       | 1                                       | 0                                        | 0                                           | 2                             |
| 2            | 2                                       | 0                                       | 0                                        | 0                                           | 2                             |
| 3            | 1                                       | 1                                       | 1                                        | 1                                           | 4                             |
| 4            | 1                                       | 2                                       | 0                                        | 0                                           | 3                             |
| 5            | 2                                       | 1                                       | 2                                        | 1                                           | 6                             |
| 6            | 0                                       | 0                                       | 2                                        | 1                                           | 3                             |
| 7            | 1                                       | 2                                       | 1                                        | 0                                           | 4                             |
| 8            | 2                                       | 2                                       | 2                                        | 0                                           | 6                             |
| 9            | 0                                       | 0                                       | 0                                        | 0                                           | 0                             |
| 10           | 1                                       | 0                                       | 0                                        | 0                                           | 1                             |
| 11           | 3                                       | 0                                       | 1                                        | 0                                           | 4                             |
| 12           | 0                                       | 3                                       | 0                                        | 0                                           | 3                             |
| 13           | 1                                       | 2                                       | 0                                        | 0                                           | 3                             |
| 14           | 1                                       | 0                                       | 3                                        | 1                                           | 5                             |
| 15           | 0                                       | 1                                       | 0                                        | 0                                           | 1                             |
| 16           | 0                                       | 0                                       | 2                                        | 0                                           | 2                             |
| 17           | 0                                       | 0                                       | 0                                        | 0                                           | 0                             |
| 18           | 0                                       | 0                                       | 0                                        | 0                                           | 0                             |
| 19           | 0                                       | 0                                       | 0                                        | 0                                           | 0                             |
| <b>Total</b> | <b>16</b>                               | <b>15</b>                               | <b>14</b>                                | <b>4</b>                                    | <b>49</b>                     |

pEFX-*rPhox2a/Arix* was co-electroporated with pEFX-AP to label native and ectopic axons. Harvested embryos ( $n=19$ ) were processed for alkaline phosphatase activity. An average of 2.6 ectopic axon exits (range 0-12) was observed.
